# Supplementary material for: Crystallization and X-ray diffraction analysis of an l-arabinonate dehydratase from Rhizobium leguminosarum bv. trifolii and a d-xylonate dehydratase from Caulobacter crescentus
Source: PubMed Central journal article supplement (PMC4973301; doi:10.1107/s2053230x16010311), 2016-07-13
Supplement: f-72-00604-sup1.pdf [file f-72-00604-sup1.pdf]

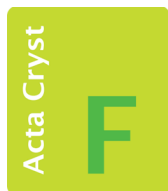

STRUCTURAL BIOLOGY  
COMMUNICATIONS

**Volume 72 (2016)**

**Supporting information for article:**

**Crystallization and X-ray diffraction analysis of an L-arabinonate dehydratase from *Rhizobium leguminosarum* bv. *trifolii* and a D-xylonate dehydratase from *Caulobacter crescentus***

**Mohammad Mubinur Rahman, Martina Andberg, Anu Koivula, Juha Rouvinen and Nina Hakulinen**

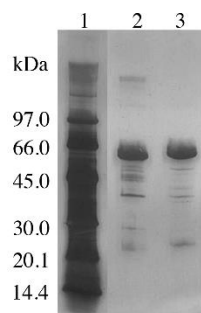

**Figure S1** SDS-gel after silver staining. Lane 1 contains low-molecular-weight protein standards, lane 2 *RlArDHT* and lane 3 *CcXyDHT*.
